# Supplementary material for: Νovel methylation biomarkers in liquid biopsy and classifying biosignatures for the clinical management of Breast Cancer
Source: Research Square preprint supplement (doi:10.21203/rs.3.rs-6697291/v1), 2025-06-19
Supplement: Supplementary file 2 [file f3a216f41256cba66981b9b3.docx]

**Supplementary Table 1: Primer sequences of all studied genes**

| Gene | Primer/Probe Sequence(5’-3’) |
| --- | --- |
| GAPDHF | TCCCCACACACATGCACTTA |
| GAPDHR | TAGTCCCAGGGCTTTGATT |
| *GAPDHPROBE* | CY5-GAGCTAGGAAGGACAGGCAACTT-BHQ2 |
| COL2A1F | AAGATGGGATAGAAGGGAATAT |
| COL2A1R | TAACAATTATAAACTCCAACCACC |
| *COL2A1PROBE* | HEX-GTGGGGATAGGTATTGGGTTAGAATGAAGG-BHQ2 |
| ACTBF | TGGTGATGGAGGAGGTTTAGTAAG |
| ACTBR | AACCAATAAAACCTACTCCTCCC |
| *ACTBPROBE* | Cy5-ACCACCACCCAACACACAATAACAAACACA-BHQ2 |
| CLDN15F | ATTTTCGTGGGGCGGGGA |
| CLDN15R | ACGCGCGACAACTATTAACGAAATAAAA |
| MRGPRDF | TCGTAAGTAGTAGCGTTAATTTCGTTAT |
| MRGPRDR | CTCCTCGCGAAACGCCTA |
| ZNF430F | AGGGAATCGTTTAATTAGGTACGTAG |
| ZNF430R | CAAAACGCTAAAAACGAAACCTA |

**Supplementary Table 2: The 300 top-ranking DMPs between BrCa and normal tissues**

| **Gene ID** | **Mean Healthy tissues** | **Mean BrCa tissues** | **Mean. Diff.Meth** | **comb.p.adj.fdr** |
| --- | --- | --- | --- | --- |
| ENSG00000163239 | 0.151260062081467 | 0.343843028171642 | -0.192582966090176 | 1,53E-58 |
| ENSG00000250007 | 0.0538061358623542 | 0.246778037507091 | -0.192971901644737 | 8,49E-40 |
| ENSG00000100505 | 0.0614070239867961 | 0.254465926984744 | -0.193058902997948 | 1,95E-43 |
| ENSG00000127920 | 0.246473652433942 | 0.439836165863387 | -0.193362513429445 | 5,08E-62 |
| ENSG00000169856 | 0.206875522625343 | 0.400253695162776 | -0.193378172537434 | 3,62E-42 |
| ENSG00000253563 | 0.0502076455831452 | 0.244586423133508 | -0.194378777550362 | 4,31E-46 |
| ENSG00000100979 | 0.179777633950243 | 0.374202128095775 | -0.194424494145531 | 1,78E-45 |
| ENSG00000169840 | 0.0665301180904619 | 0.26165639643717 | -0.195126278346708 | 3,90E-40 |
| ENSG00000105605 | 0.0409784696934875 | 0.236165056928173 | -0.195186587234686 | 4,35E-50 |
| ENSG00000148826 | 0.0481912797336611 | 0.244111685102989 | -0.195920405369328 | 2,41E-47 |
| ENSG00000253688 | 0.186563359973955 | 0.382706181820796 | -0.196142821846841 | 5,17E-57 |
| ENSG00000105989 | 0.0666921738380585 | 0.263889048208632 | -0.197196874370574 | 6,61E-48 |
| ENSG00000145416 | 0.240982326676673 | 0.438591882514381 | -0.197609555837708 | 1,01E-53 |
| ENSG00000238230 | 0.150195381041691 | 0.348406287988744 | -0.198210906947053 | 7,45E-42 |
| ENSG00000119042 | 0.0925481899053134 | 0.29086020401336 | -0.198312014108046 | 1,57E-40 |
| ENSG00000101680 | 0.047520055557072 | 0.246602783927295 | -0.199082728370223 | 2,43E-42 |
| ENSG00000125878 | 0.158467784854045 | 0.358006598763528 | -0.199538813909483 | 2,17E-40 |
| ENSG00000232151 | 0.0948824149670412 | 0.294508010913245 | -0.199625595946204 | 4,88E-43 |
| ENSG00000202496 | 0.0948824149670412 | 0.294508010913245 | -0.199625595946204 | 4,88E-43 |
| ENSG00000164330 | 0.0756603317218151 | 0.27555307034019 | -0.199892738618375 | 2,40E-41 |
| ENSG00000253230 | 0.0443433140682654 | 0.246297379802699 | -0.201954065734433 | 6,78E-56 |
| ENSG00000135318 | 0.0887957616573195 | 0.291242885168042 | -0.202447123510722 | 2,34E-40 |
| ENSG00000163288 | 0.0613300912181648 | 0.264118961764717 | -0.202788870546552 | 3,98E-70 |
| ENSG00000134121 | 0.106278061566321 | 0.309174843315924 | -0.202896781749604 | 1,51E-40 |
| ENSG00000144119 | 0.056315239347668 | 0.25969099911683 | -0.203375759769162 | 4,11E-45 |
| ENSG00000250846 | 0.0721488091668029 | 0.275699930372125 | -0.203551121205322 | 2,67E-45 |
| ENSG00000227640 | 0.0534907377434263 | 0.257259282132837 | -0.20376854438941 | 4,37E-41 |
| ENSG00000269543 | 0.150048481137034 | 0.354325421740345 | -0.204276940603311 | 3,70E-41 |
| ENSG00000135903 | 0.137714403542569 | 0.342459220905446 | -0.204744817362877 | 1,27E-42 |
| ENSG00000135312 | 0.0686088445779576 | 0.273866290907832 | -0.205257446329874 | 2,84E-50 |
| ENSG00000125285 | 0.0646682090861074 | 0.269927267601367 | -0.205259058515259 | 5,46E-40 |
| ENSG00000172803 | 0.0461525573528232 | 0.252009066934635 | -0.205856509581812 | 8,63E-51 |
| ENSG00000182901 | 0.0847313302432159 | 0.290671071908313 | -0.205939741665097 | 4,83E-42 |
| ENSG00000184611 | 0.0850323383094733 | 0.29137218927673 | -0.206339850967256 | 1,02E-39 |
| ENSG00000187714 | 0.0661659136637516 | 0.272861233819782 | -0.20669532015603 | 7,15E-55 |
| ENSG00000122254 | 0.120687092500857 | 0.327534569617633 | -0.206847477116776 | 4,05E-53 |
| ENSG00000131849 | 0.219422872337377 | 0.426379804150261 | -0.206956931812885 | 1,85E-51 |
| ENSG00000147655 | 0.074227028498599 | 0.281804243068154 | -0.207577214569555 | 1,94E-45 |
| ENSG00000169291 | 0.153763351544307 | 0.361578632967474 | -0.207815281423167 | 4,13E-60 |
| ENSG00000180318 | 0.0865214812968105 | 0.2945774791737 | -0.20805599787689 | 2,98E-49 |
| ENSG00000124205 | 0.0741640387286525 | 0.28229106187891 | -0.208127023150257 | 5,04E-50 |
| ENSG00000180279 | 0.0902631408722582 | 0.298468846198464 | -0.208205705326205 | 2,12E-53 |
| ENSG00000168959 | 0.0658822779963016 | 0.274404650159738 | -0.208522372163436 | 6,22E-62 |
| ENSG00000117707 | 0.0899168331581598 | 0.29888106012129 | -0.20896422696313 | 1,11E-43 |
| ENSG00000105991 | 0.0801031501644699 | 0.289280331912851 | -0.209177181748381 | 3,32E-47 |
| ENSG00000130037 | 0.110858238614691 | 0.320106238840223 | -0.209248000225532 | 8,06E-49 |
| ENSG00000230898 | 0.0603689895236591 | 0.269682485580255 | -0.209313496056596 | 5,59E-45 |
| ENSG00000229106 | 0.0938485723270571 | 0.304284815503407 | -0.21043624317635 | 2,31E-46 |
| ENSG00000016082 | 0.0989715471772384 | 0.309616108906987 | -0.210644561729749 | 3,62E-43 |
| ENSG00000166960 | 0.171237926283912 | 0.38217548836281 | -0.210937562078898 | 3,80E-56 |
| ENSG00000214290 | 0.24533340787981 | 0.456475416097977 | -0.211142008218167 | 9,45E-56 |
| ENSG00000165606 | 0.120785482369699 | 0.33278170907437 | -0.211996226704671 | 3,88E-42 |
| ENSG00000237989 | 0.227462168870864 | 0.44138056833409 | -0.213918399463226 | 5,27E-40 |
| ENSG00000225637 | 0.227462168870864 | 0.44138056833409 | -0.213918399463226 | 5,27E-40 |
| ENSG00000178919 | 0.0614732657016889 | 0.27579858082942 | -0.214325315127731 | 3,92E-42 |
| ENSG00000109851 | 0.0892859267431859 | 0.304296291680802 | -0.215010364937616 | 1,10E-51 |
| ENSG00000261614 | 0.218819874588702 | 0.434004923582113 | -0.215185048993411 | 1,16E-81 |
| ENSG00000229533 | 0.237086315947997 | 0.452947122286078 | -0.215860806338081 | 2,41E-42 |
| ENSG00000231536 | 0.0783318044594257 | 0.295134684115625 | -0.216802879656199 | 1,96E-56 |
| ENSG00000259285 | 0.119868921547069 | 0.337048857758324 | -0.217179936211255 | 2,89E-51 |
| ENSG00000232301 | 0.0564603593568516 | 0.274711965434888 | -0.218251606078036 | 1,99E-52 |
| ENSG00000198327 | 0.236442259354996 | 0.454791909921338 | -0.218349650566342 | 4,76E-42 |
| ENSG00000038427 | 0.0473789043798125 | 0.266709302375153 | -0.21933039799534 | 1,23E-41 |
| ENSG00000081087 | 0.142680781641788 | 0.363634842805974 | -0.220954061164186 | 1,63E-41 |
| ENSG00000185070 | 0.0418196761479727 | 0.262906939226933 | -0.221087263078961 | 4,52E-58 |
| ENSG00000112333 | 0.091322368541257 | 0.313749910407674 | -0.222427541866417 | 3,03E-46 |
| ENSG00000253661 | 0.103395278395478 | 0.326223192776238 | -0.22282791438076 | 4,67E-43 |
| ENSG00000148704 | 0.0807512961245662 | 0.304073563234756 | -0.223322267110189 | 1,44E-55 |
| ENSG00000157227 | 0.174379047494072 | 0.397785248534152 | -0.223406201040081 | 4,87E-48 |
| ENSG00000267223 | 0.0438173073589657 | 0.267226911545828 | -0.223409604186862 | 5,47E-45 |
| ENSG00000162367 | 0.196227890830034 | 0.421543122796223 | -0.22531523196619 | 2,67E-58 |
| ENSG00000205562 | 0.0414063443950591 | 0.26692746871115 | -0.225521124316091 | 3,84E-59 |
| ENSG00000173401 | 0.0856806939656954 | 0.312241146680739 | -0.226560452715044 | 4,36E-48 |
| ENSG00000127903 | 0.0984745823544476 | 0.325113339145288 | -0.22663875679084 | 7,86E-41 |
| ENSG00000268352 | 0.0984745823544476 | 0.325113339145288 | -0.22663875679084 | 7,86E-41 |
| ENSG00000228010 | 0.0631383625383486 | 0.290463582411059 | -0.22732521987271 | 1,80E-47 |
| ENSG00000272157 | 0.0581021077398179 | 0.285574489994421 | -0.227472382254603 | 4,88E-55 |
| ENSG00000269259 | 0.0862611417480532 | 0.314002881780688 | -0.227741740032635 | 1,41E-47 |
| ENSG00000269473 | 0.135633972844487 | 0.363454368987323 | -0.227820396142836 | 8,33E-56 |
| ENSG00000258405 | 0.194036101398515 | 0.422487883041222 | -0.228451781642707 | 5,73E-77 |
| ENSG00000250039 | 0.124391289748611 | 0.352884561552015 | -0.228493271803404 | 8,81E-51 |
| ENSG00000142319 | 0.14577494670771 | 0.374555437323642 | -0.228780490615932 | 1,67E-58 |
| ENSG00000216193 | 0.117989667571002 | 0.346810077491209 | -0.228820409920208 | 2,50E-41 |
| ENSG00000103449 | 0.0611417746932415 | 0.290478464124969 | -0.229336689431727 | 1,88E-57 |
| ENSG00000125798 | 0.114711849283585 | 0.344355021443881 | -0.229643172160296 | 4,49E-50 |
| ENSG00000220785 | 0.0950249752443301 | 0.324969370196623 | -0.229944394952293 | 2,19E-87 |
| ENSG00000259549 | 0.13285610318063 | 0.362906872669674 | -0.230050769489045 | 1,89E-42 |
| ENSG00000273213 | 0.0865488657256583 | 0.317009009721432 | -0.230460143995773 | 1,20E-115 |
| ENSG00000203818 | 0.0865488657256583 | 0.317009009721432 | -0.230460143995773 | 1,20E-115 |
| ENSG00000139567 | 0.146037550034706 | 0.376594521003029 | -0.230556970968323 | 1,42E-58 |
| ENSG00000254122 | 0.267395122955827 | 0.49795539588203 | -0.230560272926204 | 1,37E-70 |
| ENSG00000250439 | 0.155487395333048 | 0.386361186939583 | -0.230873791606535 | 8,63E-42 |
| ENSG00000235608 | 0.0832325674184547 | 0.314453069291218 | -0.231220501872763 | 2,26E-58 |
| ENSG00000228400 | 0.168790061652869 | 0.400621819584078 | -0.231831757931209 | 6,38E-74 |
| ENSG00000142700 | 0.0766843847901598 | 0.309051491023083 | -0.232367106232923 | 6,55E-40 |
| ENSG00000142185 | 0.100399882400222 | 0.334076651386429 | -0.233676768986206 | 1,53E-58 |
| ENSG00000174348 | 0.102230255678199 | 0.336449919585625 | -0.234219663907426 | 2,20E-59 |
| ENSG00000188452 | 0.0688898145130138 | 0.303196811499139 | -0.234306996986125 | 2,64E-56 |
| ENSG00000162992 | 0.0688898145130138 | 0.303196811499139 | -0.234306996986125 | 2,64E-56 |
| ENSG00000136352 | 0.0798509907824795 | 0.314277421693561 | -0.234426430911081 | 1,70E-46 |
| ENSG00000009709 | 0.21599944169598 | 0.450882440114927 | -0.234882998418947 | 5,59E-43 |
| ENSG00000137265 | 0.0453026756230736 | 0.280251837181395 | -0.234949161558322 | 7,93E-58 |
| ENSG00000234232 | 0.321307129427647 | 0.556450392476805 | -0.235143263049158 | 2,24E-79 |
| ENSG00000078725 | 0.113856926343092 | 0.34902582995886 | -0.235168903615768 | 5,81E-50 |
| ENSG00000206557 | 0.0474231559318756 | 0.282929260569874 | -0.235506104637999 | 4,66E-49 |
| ENSG00000100285 | 0.199171511147027 | 0.4353935906899 | -0.236222079542874 | 6,38E-50 |
| ENSG00000140682 | 0.326305381991622 | 0.562576045396762 | -0.236270663405139 | 1,35E-97 |
| ENSG00000128710 | 0.152632628581156 | 0.389042866153238 | -0.236410237572082 | 1,39E-41 |
| ENSG00000255330 | 0.0970763465023888 | 0.333567515901742 | -0.236491169399353 | 1,81E-55 |
| ENSG00000184530 | 0.0970763465023888 | 0.333567515901742 | -0.236491169399353 | 1,81E-55 |
| ENSG00000163431 | 0.0680039662695096 | 0.306169472563063 | -0.238165506293553 | 6,54E-48 |
| ENSG00000152977 | 0.130107095649342 | 0.368684028428747 | -0.238576932779404 | 6,61E-42 |
| ENSG00000172201 | 0.0467493833125696 | 0.285602474286749 | -0.238853090974179 | 3,30E-51 |
| ENSG00000085662 | 0.134954127021644 | 0.37440230452139 | -0.239448177499746 | 1,63E-49 |
| ENSG00000152760 | 0.203437137590068 | 0.442935209311393 | -0.239498071721325 | 7,78E-44 |
| ENSG00000176697 | 0.0628559234451745 | 0.302787437251093 | -0.239931513805918 | 2,71E-62 |
| ENSG00000147481 | 0.116012837987115 | 0.356547422296344 | -0.240534584309229 | 8,98E-53 |
| ENSG00000185774 | 0.107569213206737 | 0.348373621024868 | -0.240804407818132 | 8,40E-57 |
| ENSG00000151615 | 0.0828271690368878 | 0.323672048967152 | -0.240844879930264 | 3,72E-65 |
| ENSG00000189134 | 0.339046265842105 | 0.57990561210072 | -0.240859346258615 | 5,75E-128 |
| ENSG00000249082 | 0.23885103579818 | 0.479758897145592 | -0.240907861347412 | 4,64E-56 |
| ENSG00000240929 | 0.130177966121561 | 0.371202847050398 | -0.241024880928838 | 3,81E-97 |
| ENSG00000230186 | 0.130177966121561 | 0.371202847050398 | -0.241024880928838 | 3,81E-97 |
| ENSG00000187391 | 0.120298713377346 | 0.362007563322336 | -0.24170884994499 | 3,93E-65 |
| ENSG00000125816 | 0.130916719129785 | 0.372678412165572 | -0.241761693035788 | 7,49E-59 |
| ENSG00000164438 | 0.176046881206548 | 0.417880946562969 | -0.241834065356421 | 4,15E-45 |
| ENSG00000196711 | 0.0851623956456374 | 0.328099828402949 | -0.242937432757312 | 6,64E-51 |
| ENSG00000254377 | 0.111923984111569 | 0.35521569850064 | -0.243291714389072 | 2,43E-41 |
| ENSG00000225872 | 0.0566419624359863 | 0.300432483684924 | -0.243790521248938 | 9,23E-68 |
| ENSG00000113248 | 0.252681842215571 | 0.497118245136611 | -0.24443640292104 | 8,47E-49 |
| ENSG00000214338 | 0.0732465684049646 | 0.318211947475233 | -0.244965379070269 | 1,40E-60 |
| ENSG00000163618 | 0.100488326649762 | 0.345944572738982 | -0.24545624608922 | 1,50E-56 |
| ENSG00000198431 | 0.191998534955053 | 0.438283950320674 | -0.24628541536562 | 6,95E-45 |
| ENSG00000267905 | 0.0691353106947563 | 0.316281535948966 | -0.247146225254209 | 8,29E-46 |
| ENSG00000266248 | 0.0781703714774162 | 0.32558533363736 | -0.247414962159944 | 1,89E-42 |
| ENSG00000091844 | 0.0574298879473691 | 0.304862181142628 | -0.247432293195259 | 1,33E-41 |
| ENSG00000176769 | 0.159796366063937 | 0.407400889896431 | -0.247604523832494 | 4,31E-54 |
| ENSG00000166573 | 0.0826748570061842 | 0.330364599497905 | -0.247689742491721 | 7,99E-60 |
| ENSG00000126561 | 0.26935676879636 | 0.517592661174073 | -0.248235892377713 | 3,35E-59 |
| ENSG00000187715 | 0.175420097801648 | 0.423870055037179 | -0.248449957235531 | 3,01E-48 |
| ENSG00000152192 | 0.0511633525477105 | 0.299941866113074 | -0.248778513565364 | 6,14E-48 |
| ENSG00000175879 | 0.120221630061638 | 0.369098091436322 | -0.248876461374684 | 1,43E-51 |
| ENSG00000007372 | 0.136710430956052 | 0.385893030678149 | -0.249182599722098 | 1,47E-59 |
| ENSG00000234595 | 0.106784792179606 | 0.356047788383407 | -0.249262996203801 | 6,84E-68 |
| ENSG00000168267 | 0.0998280521423673 | 0.349309885229714 | -0.249481833087347 | 5,11E-64 |
| ENSG00000197083 | 0.22209802692615 | 0.471975179609131 | -0.24987715268298 | 1,41E-79 |
| ENSG00000136099 | 0.0975694520292054 | 0.347463249813188 | -0.249893797783983 | 3,87E-63 |
| ENSG00000112246 | 0.156416167058416 | 0.406542282222166 | -0.25012611516375 | 2,44E-47 |
| ENSG00000112837 | 0.0732073401711892 | 0.323466338743022 | -0.250258998571833 | 2,98E-61 |
| ENSG00000264323 | 0.0822800168302137 | 0.333867846646006 | -0.251587829815792 | 6,40E-65 |
| ENSG00000260053 | 0.109679931740417 | 0.363013602641968 | -0.253333670901551 | 7,12E-96 |
| ENSG00000225280 | 0.109797647799947 | 0.363346384090125 | -0.253548736290178 | 1,42E-69 |
| ENSG00000232742 | 0.155019386103216 | 0.408987742335794 | -0.253968356232579 | 3,56E-129 |
| ENSG00000227193 | 0.193869348781459 | 0.448027873702225 | -0.254158524920766 | 8,21E-76 |
| ENSG00000223345 | 0.193869348781459 | 0.448027873702225 | -0.254158524920766 | 8,21E-76 |
| ENSG00000234998 | 0.193869348781459 | 0.448027873702225 | -0.254158524920766 | 8,21E-76 |
| ENSG00000182255 | 0.0982845666368303 | 0.352497246527495 | -0.254212679890665 | 2,14E-61 |
| ENSG00000261821 | 0.202626848466862 | 0.456840892847777 | -0.254214044380915 | 4,21E-53 |
| ENSG00000139800 | 0.203399455242283 | 0.458788651702356 | -0.255389196460074 | 1,55E-79 |
| ENSG00000259430 | 0.0717844202041101 | 0.328453231171173 | -0.256668810967062 | 2,62E-63 |
| ENSG00000203808 | 0.0493762704824295 | 0.306364774525736 | -0.256988504043307 | 7,56E-44 |
| ENSG00000116132 | 0.171634291094577 | 0.429547912581396 | -0.257913621486819 | 3,19E-64 |
| ENSG00000198028 | 0.131160592595463 | 0.389563442180632 | -0.258402849585169 | 4,21E-82 |
| ENSG00000122585 | 0.0931935240961304 | 0.351934331108277 | -0.258740807012147 | 9,96E-51 |
| ENSG00000160321 | 0.169729143861574 | 0.428802798395879 | -0.259073654534305 | 1,49E-72 |
| ENSG00000155052 | 0.135696083179501 | 0.395334008173003 | -0.259637924993502 | 1,64E-84 |
| ENSG00000164458 | 0.0750400108992808 | 0.334763511255667 | -0.259723500356386 | 5,24E-65 |
| ENSG00000164736 | 0.112571503163921 | 0.372378586463351 | -0.25980708329943 | 3,12E-71 |
| ENSG00000198914 | 0.113786322880037 | 0.373884772679349 | -0.260098449799312 | 8,28E-44 |
| ENSG00000182968 | 0.135308011988285 | 0.395506878497864 | -0.260198866509579 | 7,12E-96 |
| ENSG00000269037 | 0.196556723554799 | 0.457297085861266 | -0.260740362306467 | 2,00E-59 |
| ENSG00000158691 | 0.0800362670195547 | 0.341198439213887 | -0.261162172194332 | 1,19E-67 |
| ENSG00000267273 | 0.151392672445665 | 0.412583526549684 | -0.261190854104019 | 1,99E-80 |
| ENSG00000258169 | 0.109040885408212 | 0.370520351696994 | -0.261479466288781 | 4,22E-57 |
| ENSG00000157152 | 0.0931949215878769 | 0.355650487483843 | -0.262455565895966 | 1,79E-41 |
| ENSG00000258636 | 0.0573525356765918 | 0.32001675249478 | -0.262664216818189 | 1,93E-68 |
| ENSG00000171794 | 0.124538237846727 | 0.38770843040098 | -0.263170192554253 | 1,20E-68 |
| ENSG00000206579 | 0.0802828826101225 | 0.344346233013308 | -0.264063350403185 | 3,04E-68 |
| ENSG00000234531 | 0.188711470498565 | 0.452992513393057 | -0.264281042894492 | 9,03E-85 |
| ENSG00000237380 | 0.16598285593973 | 0.430353687598443 | -0.264370831658714 | 4,81E-46 |
| ENSG00000164326 | 0.230513956112786 | 0.49525646922483 | -0.264742513112044 | 1,45E-78 |
| ENSG00000272457 | 0.0705464057405482 | 0.336132650237573 | -0.265586244497024 | 5,95E-47 |
| ENSG00000178187 | 0.122985269610187 | 0.388852964777202 | -0.265867695167016 | 1,08E-68 |
| ENSG00000148798 | 0.0590760597613051 | 0.326285070090802 | -0.267209010329497 | 1,14E-61 |
| ENSG00000198626 | 0.236802528660371 | 0.504176593963168 | -0.267374065302797 | 3,07E-51 |
| ENSG00000267130 | 0.204347210191304 | 0.47320883745796 | -0.268861627266656 | 1,32E-58 |
| ENSG00000150361 | 0.305000357652455 | 0.574999393197906 | -0.269999035545452 | 2,78E-62 |
| ENSG00000271709 | 0.109730921604218 | 0.380693476683272 | -0.270962555079054 | 1,18E-85 |
| ENSG00000013297 | 0.124205867799393 | 0.395274417749793 | -0.2710685499504 | 1,38E-50 |
| ENSG00000264515 | 0.0616210871431155 | 0.332778554583297 | -0.271157467440181 | 4,45E-50 |
| ENSG00000187135 | 0.0616210871431155 | 0.332778554583297 | -0.271157467440181 | 4,45E-50 |
| ENSG00000214295 | 0.113513987083958 | 0.385177975253624 | -0.271663988169667 | 4,62E-46 |
| ENSG00000175164 | 0.0681647678284739 | 0.341191100509326 | -0.273026332680852 | 1,88E-62 |
| ENSG00000255778 | 0.0932485164398794 | 0.366302025570629 | -0.27305350913075 | 3,54E-60 |
| ENSG00000263400 | 0.141079490061498 | 0.415298010431076 | -0.274218520369578 | 2,30E-78 |
| ENSG00000152578 | 0.0955469067000741 | 0.370091335787868 | -0.274544429087794 | 7,39E-54 |
| ENSG00000266043 | 0.154173335924365 | 0.429419599295991 | -0.275246263371626 | 2,19E-51 |
| ENSG00000199077 | 0.0605669434196194 | 0.336022789788142 | -0.275455846368523 | 2,68E-65 |
| ENSG00000229694 | 0.112263669149847 | 0.387771420593795 | -0.275507751443947 | 1,88E-48 |
| ENSG00000146618 | 0.149186694784203 | 0.424756172801397 | -0.275569478017194 | 2,53E-60 |
| ENSG00000123700 | 0.0453840431403791 | 0.321243206549396 | -0.275859163409017 | 4,75E-60 |
| ENSG00000100987 | 0.171157170273448 | 0.447642752727964 | -0.276485582454516 | 1,61E-79 |
| ENSG00000177294 | 0.0561484690120329 | 0.333306052462103 | -0.27715758345007 | 1,85E-57 |
| ENSG00000207816 | 0.100930290327401 | 0.37819968527298 | -0.277269394945579 | 1,71E-61 |
| ENSG00000181234 | 0.0830629593227991 | 0.36099491993085 | -0.277931960608051 | 2,13E-81 |
| ENSG00000088882 | 0.0747855751036379 | 0.352819646125007 | -0.27803407102137 | 3,05E-66 |
| ENSG00000180712 | 0.0543767177908969 | 0.333364060281175 | -0.278987342490278 | 4,09E-62 |
| ENSG00000272191 | 0.190139506766332 | 0.469364431754547 | -0.279224924988215 | 8,41E-54 |
| ENSG00000101017 | 0.22425836357653 | 0.504155088133614 | -0.279896724557085 | 3,93E-65 |
| ENSG00000260163 | 0.139719956928919 | 0.419883900149014 | -0.280163943220095 | 3,62E-51 |
| ENSG00000129467 | 0.26093400893467 | 0.541289318225701 | -0.280355309291031 | 1,06E-45 |
| ENSG00000121853 | 0.123489669309589 | 0.404769074640157 | -0.281279405330568 | 6,11E-90 |
| ENSG00000113721 | 0.130183908453495 | 0.41321274209336 | -0.283028833639865 | 1,55E-60 |
| ENSG00000188730 | 0.031768093992086 | 0.315081174799215 | -0.283313080807129 | 3,36E-50 |
| ENSG00000249505 | 0.117831962159477 | 0.401370391681979 | -0.283538429522502 | 1,42E-68 |
| ENSG00000207933 | 0.153868544848725 | 0.438294909841938 | -0.284426364993212 | 1,25E-55 |
| ENSG00000254254 | 0.22439010607087 | 0.508950309635143 | -0.284560203564272 | 1,65E-101 |
| ENSG00000106799 | 0.250335612096586 | 0.535902541031154 | -0.285566928934568 | 1,18E-58 |
| ENSG00000143032 | 0.132207825018279 | 0.417777715451829 | -0.285569890433549 | 1,73E-71 |
| ENSG00000253250 | 0.0956863913809484 | 0.38189864133432 | -0.286212249953372 | 1,72E-62 |
| ENSG00000129596 | 0.180431333655266 | 0.467080317195111 | -0.286648983539845 | 1,99E-71 |
| ENSG00000165821 | 0.314020985541829 | 0.6016428051517 | -0.287621819609872 | 3,20E-98 |
| ENSG00000007516 | 0.0924535923053522 | 0.381137327709911 | -0.288683735404559 | 2,84E-42 |
| ENSG00000260634 | 0.0870927316970299 | 0.376849690206896 | -0.289756958509866 | 1,30E-46 |
| ENSG00000253305 | 0.150447301436283 | 0.442535613096788 | -0.292088311660505 | 1,93E-62 |
| ENSG00000145908 | 0.0982042293836359 | 0.39112300305491 | -0.292918773671274 | 4,05E-50 |
| ENSG00000235051 | 0.127501402357795 | 0.420426350382542 | -0.292924948024747 | 1,69E-53 |
| ENSG00000231162 | 0.112763642742946 | 0.407797916397987 | -0.295034273655041 | 8,42E-82 |
| ENSG00000231868 | 0.155102951796233 | 0.45022966338387 | -0.295126711587637 | 8,09E-42 |
| ENSG00000124827 | 0.136037654706598 | 0.431243639740935 | -0.295205985034336 | 6,59E-71 |
| ENSG00000254675 | 0.0671676578206914 | 0.362854746600718 | -0.295687088780027 | 5,58E-40 |
| ENSG00000106236 | 0.122417758188786 | 0.418891685176856 | -0.29647392698807 | 2,30E-75 |
| ENSG00000069431 | 0.127622940747378 | 0.424187050724858 | -0.296564109977481 | 5,47E-82 |
| ENSG00000188738 | 0.171596056666182 | 0.470100915055386 | -0.298504858389204 | 1,85E-57 |
| ENSG00000197959 | 0.143099518048235 | 0.441648939590629 | -0.298549421542394 | 9,69E-46 |
| ENSG00000147596 | 0.12971902564126 | 0.428553925131881 | -0.298834899490621 | 4,94E-74 |
| ENSG00000198885 | 0.129582303454653 | 0.428848138132665 | -0.299265834678012 | 2,47E-85 |
| ENSG00000271776 | 0.221443908596367 | 0.520909896853403 | -0.299465988257035 | 1,41E-72 |
| ENSG00000260902 | 0.125169143654615 | 0.428673004934177 | -0.303503861279561 | 2,99E-68 |
| ENSG00000253471 | 0.110635944354721 | 0.414436710774002 | -0.303800766419281 | 7,24E-96 |
| ENSG00000270544 | 0.112973161564667 | 0.416877892083521 | -0.303904730518854 | 1,12E-71 |
| ENSG00000169515 | 0.215569097866608 | 0.520225022482729 | -0.304655924616121 | 2,73E-78 |
| ENSG00000179059 | 0.219157082620549 | 0.525320383187952 | -0.306163300567403 | 2,25E-60 |
| ENSG00000053702 | 0.164913988438617 | 0.47110952505177 | -0.306195536613152 | 2,06E-47 |
| ENSG00000138039 | 0.148889350809624 | 0.455310914057324 | -0.3064215632477 | 2,10E-46 |
| ENSG00000201142 | 0.220926445534013 | 0.527836135854499 | -0.306909690320486 | 8,66E-75 |
| ENSG00000185274 | 0.0638409522805124 | 0.371573823089957 | -0.307732870809445 | 5,22E-72 |
| ENSG00000256463 | 0.0712367606551176 | 0.379329731824544 | -0.308092971169426 | 3,62E-80 |
| ENSG00000263146 | 0.0725110230961022 | 0.380954322003801 | -0.308443298907699 | 2,26E-84 |
| ENSG00000272163 | 0.107849714418768 | 0.416735189548589 | -0.308885475129821 | 4,25E-97 |
| ENSG00000166501 | 0.0757093872828011 | 0.386596249314706 | -0.310886862031905 | 7,94E-74 |
| ENSG00000196581 | 0.137844089044844 | 0.449348393201861 | -0.311504304157017 | 2,16E-77 |
| ENSG00000263958 | 0.0677010051515817 | 0.380381305607168 | -0.312680300455586 | 1,32E-91 |
| ENSG00000262668 | 0.14002353052714 | 0.453817939913494 | -0.313794409386354 | 2,16E-54 |
| ENSG00000226740 | 0.103735992816222 | 0.417592396918547 | -0.313856404102325 | 1,61E-59 |
| ENSG00000151388 | 0.187189886161032 | 0.502599323998311 | -0.31540943783728 | 7,70E-63 |
| ENSG00000128652 | 0.110830086702839 | 0.426375695529784 | -0.315545608826945 | 3,19E-65 |
| ENSG00000180053 | 0.10651498675356 | 0.426585105799561 | -0.320070119046001 | 9,28E-100 |
| ENSG00000077327 | 0.185857294017874 | 0.50630467557098 | -0.320447381553106 | 3,10E-108 |
| ENSG00000272311 | 0.212418059115062 | 0.533380197686099 | -0.320962138571038 | 7,53E-87 |
| ENSG00000117477 | 0.291093264636957 | 0.612091286928621 | -0.320998022291664 | 1,23E-49 |
| ENSG00000234437 | 0.291093264636957 | 0.612091286928621 | -0.320998022291664 | 1,23E-49 |
| ENSG00000168243 | 0.23041010829608 | 0.553563838032782 | -0.323153729736702 | 2,95E-69 |
| ENSG00000181201 | 0.130400508035655 | 0.454607644193014 | -0.324207136157359 | 9,81E-67 |
| ENSG00000136732 | 0.0909993366759498 | 0.416634754335164 | -0.325635417659214 | 3,53E-70 |
| ENSG00000183729 | 0.0993862352717768 | 0.425756489806904 | -0.326370254535127 | 2,26E-45 |
| ENSG00000268182 | 0.173737780149489 | 0.502196903783879 | -0.32845912363439 | 1,50E-85 |
| ENSG00000010278 | 0.119185302386997 | 0.449578417746226 | -0.330393115359229 | 1,37E-43 |
| ENSG00000269235 | 0.333010146177162 | 0.663832343332902 | -0.33082219715574 | 9,78E-79 |
| ENSG00000258082 | 0.0521124993765036 | 0.386818011650411 | -0.334705512273907 | 2,03E-49 |
| ENSG00000242078 | 0.164700282341017 | 0.503487489226512 | -0.338787206885495 | 4,47E-77 |
| ENSG00000236773 | 0.141561584210391 | 0.483068121449651 | -0.34150653723926 | 1,60E-102 |
| ENSG00000143753 | 0.141561584210391 | 0.483068121449651 | -0.34150653723926 | 1,60E-102 |
| ENSG00000179909 | 0.147841452108408 | 0.49110978625168 | -0.343268334143272 | 1,37E-61 |
| ENSG00000006128 | 0.120099018942035 | 0.463847870967349 | -0.343748852025314 | 2,17E-78 |
| ENSG00000176014 | 0.16634618411455 | 0.510327727005766 | -0.343981542891216 | 6,66E-50 |
| ENSG00000255387 | 0.0980919926045684 | 0.442984691105958 | -0.344892698501389 | 1,66E-52 |
| ENSG00000135390 | 0.221699917830539 | 0.568427007646307 | -0.346727089815768 | 3,17E-91 |
| ENSG00000166342 | 0.122889985581038 | 0.473803342946787 | -0.350913357365749 | 1,65E-101 |
| ENSG00000182511 | 0.205535463103903 | 0.556820795072124 | -0.351285331968221 | 6,37E-82 |
| ENSG00000239608 | 0.23781554104547 | 0.594109439376228 | -0.356293898330758 | 1,54E-70 |
| ENSG00000136859 | 0.170006938967943 | 0.52635133670585 | -0.356344397737907 | 6,63E-83 |
| ENSG00000234283 | 0.116585435674591 | 0.475575858884775 | -0.358990423210184 | 1,39E-116 |
| ENSG00000201041 | 0.16825240142574 | 0.528270307670659 | -0.360017906244919 | 1,39E-61 |
| ENSG00000252866 | 0.16825240142574 | 0.528270307670659 | -0.360017906244919 | 1,39E-61 |
| ENSG00000248550 | 0.128987538845363 | 0.490553509816799 | -0.361565970971436 | 4,17E-68 |
| ENSG00000253837 | 0.0616058099901982 | 0.423352962450938 | -0.36174715246074 | 3,13E-71 |
| ENSG00000187626 | 0.169820167471423 | 0.531579860709911 | -0.361759693238488 | 2,49E-148 |
| ENSG00000124721 | 0.0824909640991996 | 0.446951844339046 | -0.364460880239846 | 2,84E-100 |
| ENSG00000227817 | 0.148483943833169 | 0.513488457616077 | -0.365004513782908 | 2,02E-78 |
| ENSG00000130226 | 0.141181990640444 | 0.520197456524118 | -0.379015465883674 | 1,86E-101 |
| ENSG00000234921 | 0.199507536143014 | 0.581568570688249 | -0.382061034545235 | 1,13E-92 |
| ENSG00000250850 | 0.100745514193893 | 0.485272318141653 | -0.384526803947761 | 8,36E-92 |
| ENSG00000267110 | 0.118376626481425 | 0.508949408555211 | -0.390572782073786 | 2,38E-126 |
| ENSG00000270935 | 0.175925173037271 | 0.566875803785296 | -0.390950630748024 | 1,23E-106 |
| ENSG00000230798 | 0.216342228052664 | 0.608527648822897 | -0.392185420770233 | 6,46E-67 |
| ENSG00000177707 | 0.156720437887383 | 0.560731166054526 | -0.404010728167143 | 7,48E-83 |
| ENSG00000237797 | 0.0783311518657016 | 0.488696484329926 | -0.410365332464224 | 1,68E-44 |
| ENSG00000230756 | 0.189070095764177 | 0.683609909145416 | -0.494539813381238 | 4,61E-134 |

Abbreviation: DMPs: Differentially Methylated Promoters

**Supplementary Table 3: Genes involved in the pathophysiology of Breast Cancer according to the literature and used as reference protein list in the multiple UniReD tool.**

| UniProt ID | Gene | Protein | Reference |
| --- | --- | --- | --- |
| P38398 | **BRCA1** | Breast cancer type 1 susceptibility protein | (Narod and Salmena 2011) |
| A0A248X3Z0 | **BRCA2** | Breast cancer type 2 susceptibility protein | (Narod and Salmena 2011) |
| Q9NS23 | **RASSF1** | Ras association domain-containing protein 1 | (Li, Wang et al. 2019) |
| P03372 | **ESR1** | Estrogen Receptor 1 | (Dustin, Gu et al. 2019) |
| P04637 | **TP53** | Cellular tumor antigen p53 | (Li, Chen et al. 2020) |
| P42336 | **PIK3CA** | Phosphatidylinositol-4,5-Bisphosphate 3-Kinase Catalytic Subunit Alpha | (Arsenic, Lehmann et al. 2014) |
| Q9HCU9 | **BRMS1** | Breast Cancer Metastasis Suppressor | (Zhang, Ye et al. 2014) |
| P12830 | **CDH1** | Cadherin | (Corso, Veronesi et al. 2018) |
| Q15828 | **CST6** | Cystatin E/M | (Chimonidou, Tzitzira et al. 2013) |
| P60484 | **PTEN** | Phosphatidylinositol 3,4,5-trisphosphate 3-phosphatase and dual-specificity protein phosphatase | (Carbognin, Miglietta et al. 2019) |

Narod, S.A. and L. Salmena, BRCA1 and BRCA2 mutations and breast cancer. Discov Med, 2011. 12(66): p. 445-53.

Li, M., et al., Diagnostic value of RASSF1A methylation for breast cancer: a meta-analysis. Biosci Rep, 2019. 39(6).

Dustin, D., G. Gu, and S.A.W. Fuqua, ESR1 mutations in breast cancer. Cancer, 2019. 125(21): p. 3714-3728.

Li, X., et al., Impact of TP53 mutations in breast cancer: Clinicopathological features and prognosisImpact of TP53 mutations in breast CA. Thorac Cancer, 2020. 11(7): p. 1861-1868.

Arsenic, R., et al., Analysis of PIK3CA mutations in breast cancer subtypes. Appl Immunohistochem Mol Morphol, 2014. 22(1): p. 50-6.

Zhang, Y., et al., Expression of breast cancer metastasis suppressor-1, BRMS-1, in human breast cancer and the biological impact of BRMS-1 on the migration of breast cancer cells. Anticancer Res, 2014. 34(3): p. 1417-26.

Corso, G., et al., Prognosis and outcome in CDH1-mutant lobular breast cancer. Eur J Cancer Prev, 2018. 27(3): p. 237-238.

Carbognin, L., et al., Prognostic and Predictive Implications of PTEN in Breast Cancer: Unfulfilled Promises but Intriguing Perspectives. Cancers (Basel), 2019. 11(9).

Chimonidou, M., et al., CST6 promoter methylation in circulating cell-free DNA of breast cancer patients. Clinical Biochemistry, 2013. 46(3): p. 235-240.
